# Supplementary material
Source: Springer Nature journal article supplement (https://www.springermedizin.de/resource/supplementary/13058_2013_3445_MOESM10_ESM.pdf/9704012)

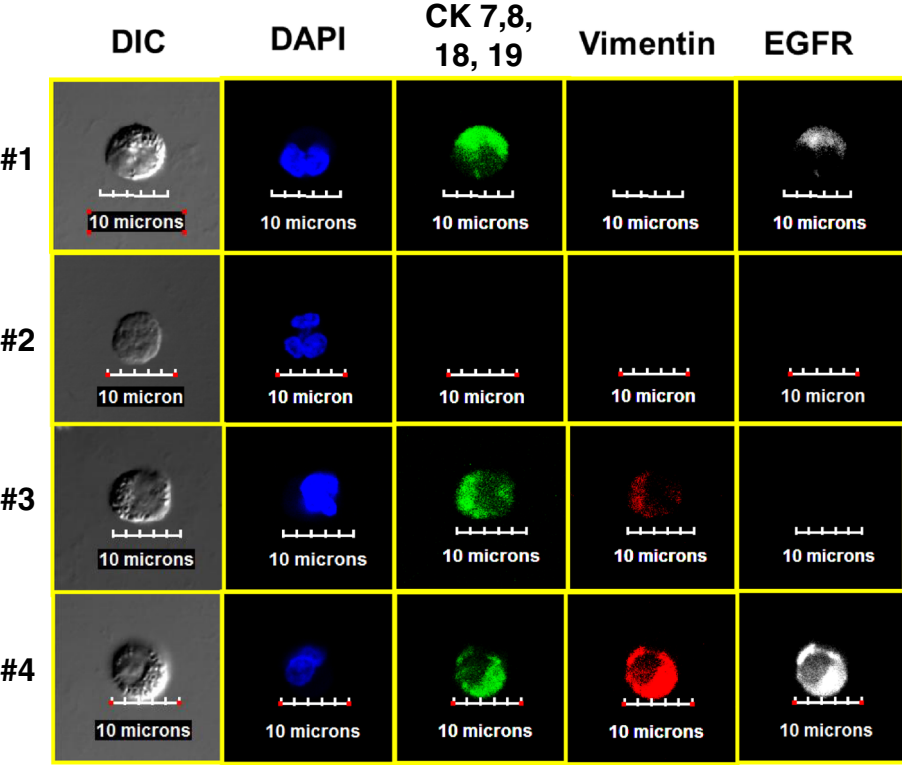

Supplement: MOESM10 [file 9704012]
